# Supplementary material for: Meta‐analysis of postoperative pain using non‐sutured or sutured single‐layer open mesh repair for inguinal hernia
Source: PubMed Central journal article supplement (PMC6551402; doi:10.1002/bjs5.50139), 2019-02-27
Supplement: BJS5-3-260-s003.pdf [file BJS5-3-260-s003.pdf]

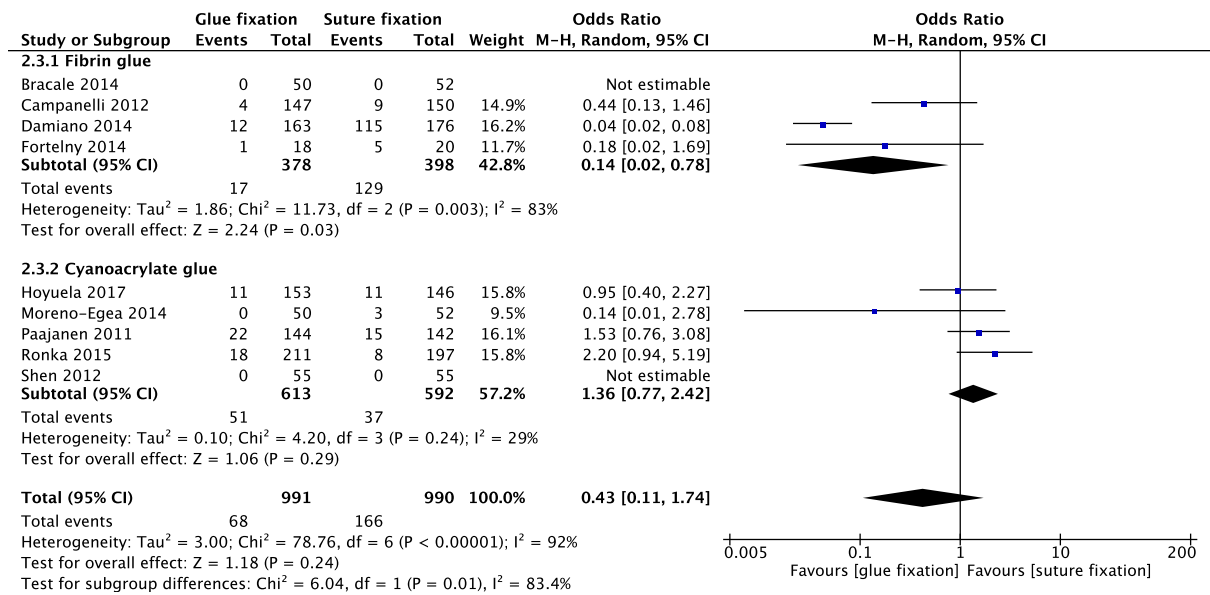

Supporting information: figure 3 Forest plot comparing the incidence of chronic pain (VAS>3) of glue-fixation and suture fixation at 12 month postoperatively.
