# Supplementary material for: Meta‐analysis of postoperative pain using non‐sutured or sutured single‐layer open mesh repair for inguinal hernia
Source: PubMed Central journal article supplement (PMC6551402; doi:10.1002/bjs5.50139), 2019-02-27
Supplement: BJS5-3-260-s004.pdf [file BJS5-3-260-s004.pdf]

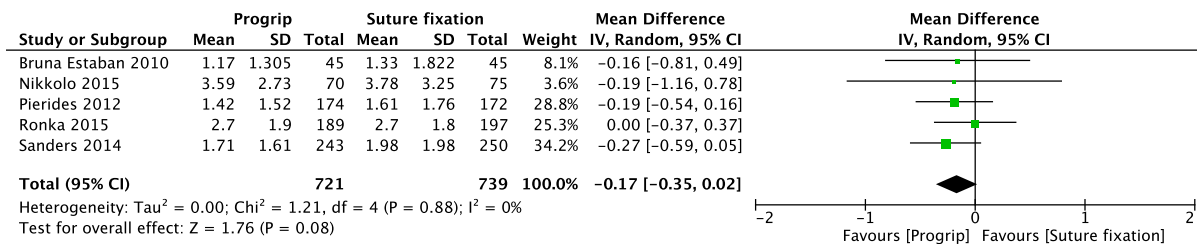

Supporting information: figure 4 Forest plot comparing mean VAS-score of ProGrip™ and suture fixation at 1 week postoperatively.
