# Supplementary material for: Meta‐analysis of postoperative pain using non‐sutured or sutured single‐layer open mesh repair for inguinal hernia
Source: PubMed Central journal article supplement (PMC6551402; doi:10.1002/bjs5.50139), 2019-02-27
Supplement: BJS5-3-260-s007.pdf [file BJS5-3-260-s007.pdf]

## Supporting information: table 1 Search in Embase, Cochrane CENTRAL, Pubmed

### Embase

1. inguinal hernia/
2. hemioplasty/ or surgical mesh/ or lichtenstein.mp.
3. postoperative pain/ or pain/
4. 1 and 2
5. 3 and 4

### Cochrane CENTRAL

- | ID  | Search                                                   |
|-----|----------------------------------------------------------|
| #1  | (inguinal hernia) or groin hernia                        |
| #2  | MeSH descriptor: [Hernia, Inguinal] explode all trees    |
| #3  | ((open repair) or mesh repair) or Lichtenstein)          |
| #4  | MeSH descriptor: [Surgical Mesh] explode all trees       |
| #5  | pain                                                     |
| #6  | MeSH descriptor: [Pain, Postoperative] explode all trees |
| #7  | (#1) or #2                                               |
| #8  | #3 or #4                                                 |
| #9  | #5 or #6                                                 |
| #10 | ((#7) and #8) and #9                                     |

### Pubmed

((("hernia, inguinal"[MeSH Terms] OR ("hernia"[All Fields] AND "inguinal"[All Fields]) OR "inguinal hernia"[All Fields] OR ("inguinal"[All Fields] AND "hernia"[All Fields])) OR ("groin"[MeSH Terms] OR "groin"[All Fields] AND ("hernia"[MeSH Terms] OR "hernia"[All Fields]))) OR "Hernia, Inguinal"[Mesh]) AND (((open[All Fields] AND "repair"[All Fields]) OR ("mesh"[All Fields] AND "repair"[All Fields])) OR Lichtenstein[All Fields] OR "Surgical Mesh"[Mesh])) AND (("pain"[MeSH Terms] OR "pain"[All Fields]) OR "Pain, Postoperative"[Mesh])
