# Supplementary material for: Meta‐analysis of postoperative pain using non‐sutured or sutured single‐layer open mesh repair for inguinal hernia
Source: PubMed Central journal article supplement (PMC6551402; doi:10.1002/bjs5.50139), 2019-02-27
Supplement: BJS5-3-260-s008.pdf [file BJS5-3-260-s008.pdf]

Table 2 complications after mesh placement; hematoma, seroma or surgical site infection.  
 Comparing glue fixation to suture fixation and ProGrip™ to suture fixation.

|                         | Glue fixation vs Suture fixation<br>OR (95%CI) p-value | ProGrip™ vs Suture fixation<br>OR (95%CI) p-value    |
|-------------------------|--------------------------------------------------------|------------------------------------------------------|
| Hematoma                | 0.70 (0.45 to 1.07) p=0.10<br>PI 95% (0.13 to 3.74)    | 1.00 (0.67 to 1.48) p=0.98<br>PI 95% (0.40 to 2.49)  |
| Seroma                  | 0.75 (0.33 to 1.68) p=0.49<br>PI 95% (0.04 to 15.76)   | 0.89 (0.55 to 1.45) p=0.64<br>PI 95% (0.25 to 3.23)  |
| Surgical Site infection | 1.16 (0.45 to 3.01) p=0.75<br>PI 95% (0.01 to 97.15)   | 0.67 (0.38 to 1.19) p=0.17<br>PI 95% (0.02 to 29.32) |
